# Supplementary material
Source: Springer Nature journal article supplement (https://www.springermedizin.de/resource/supplementary/12936_2008_655_MOESM1_ESM.pdf/9547928)

## Legend:

### Infrastructures

-  District Hospital
-  CQ Health Centre
-  IPT/SP Health Centre
-  IPT/SP+promotion Health Centre
-  Health Centre
-  Study Village
-  Major roads
-  Forest

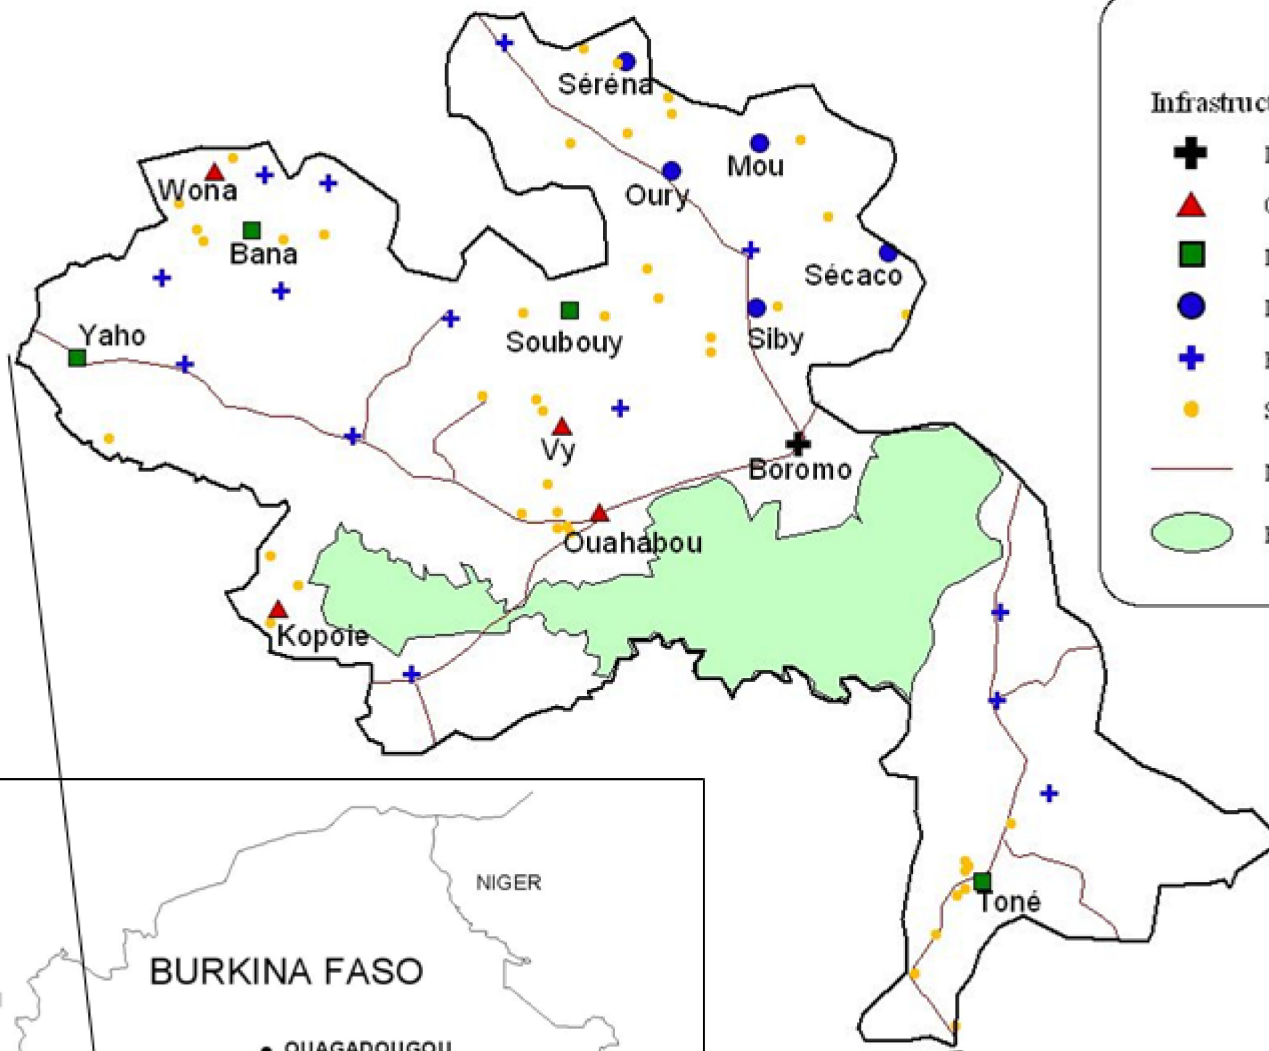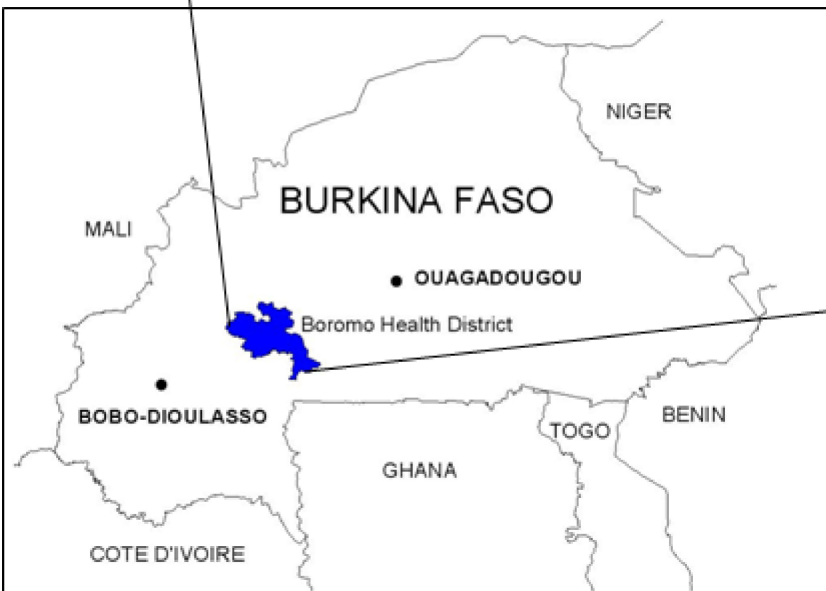

Supplement: MOESM1 [file 9547928]
